# Supplementary material for: PM2.5 leads to adverse pregnancy outcomes by inducing trophoblast oxidative stress and mitochondrial apoptosis via KLF9/CYP1A1 transcriptional axis
Source: eLife journal article supplement (doi:10.7554/elife.85944), 2023-09-22
Supplement: fig5-data1 [file Figure5-source data1-Figure legends.docx]

**Figure5B-HO-1** The expression of HO-1 expression in the placental tissue of Wild Type (The first three columns) and PM2.5-treated mice (the last three columns).

**Figure5B-NQO-1** The expression of NQO-1 expression in the placental tissue of Wild Type (The first three columns) and PM2.5-treated mice (the last three columns).

**Figure5B-GCLC** The expression of GCLC expression in the placental tissue of Wild Type (The first three columns) and PM2.5-treated mice (the last three columns).

**Figure5B-SOD-1** The expression of SOD-1 expression in the placental tissue of Wild Type (The first three columns) and PM2.5-treated mice (the last three columns).

**Figure5B-β-actin** The expression of β-actin expression in the placental tissue of Wild Type (The first three columns) and PM2.5-treated mice (the last three columns).

**Figure5C-HO-1** The expression of HO-1 expression in the PM2.5-treated HTR8/SVneo cells (PM2.5 concentration: 0. 50μg/mL, 100μg/mL, 200μg/mL)

**Figure5C-NQO-1** The expression of NQO-1 expression in the PM2.5-treated HTR8/SVneo cells (PM2.5 concentration: 0. 50μg/mL, 100μg/mL, 200μg/mL)

**Figure5C-GCLC** The expression of GCLC expression in the PM2.5-treated HTR8/SVneo cells (PM2.5 concentration: 0. 50μg/mL, 100μg/mL, 200μg/mL)

**Figure5C-SOD-1** The expression of SOD-1 expression in the PM2.5-treated HTR8/SVneo cells (PM2.5 concentration: 0. 50μg/mL, 100μg/mL, 200μg/mL)

**Figure5C-β-actin** The expression of β-actin expression in the PM2.5-treated HTR8/SVneo cells (PM2.5 concentration: 0. 50μg/mL, 100μg/mL, 200μg/mL)

**Figure5K-Mito-Cyt-c** The expression of Cyt-c expression in mitochondria after treated with different concentration of PM2.5 (0, 50μg/mL, 100μg/mL, 200μg/mL)

**Figure5K-Mito-VDAC-1** The expression of VDAC-1 expression in mitochondria after treated with different concentration of PM2.5 (0, 50μg/mL, 100μg/mL, 200μg/mL)

**Figure5K-Cyto-Cyt-c** The expression of Cyt-c expression in cytoplasm after treated with different concentration of PM2.5 (0, 50μg/mL, 100μg/mL, 200μg/mL)

**Figure5K-Cyto-BCL-2** The expression of BCL-2 expression in cytoplasm after treated with different concentration of PM2.5 (0, 50μg/mL, 100μg/mL, 200μg/mL)

**Figure5K-Cyto-BAX** The expression of BAX expression in cytoplasm after treated with different concentration of PM2.5 (0, 50μg/mL, 100μg/mL, 200μg/mL)

**Figure5K-Cyto-CC3** The expression of Cleaved-Caspase 3 expression in cytoplasm after treated with different concentration of PM2.5 (0, 50μg/mL, 100μg/mL, 200μg/mL)

**Figure5K-Cyto-****β-actin** The expression of β-actin expression in cytoplasm after treated with different concentration of PM2.5 (0, 50μg/mL, 100μg/mL, 200μg/mL)
