# Supplementary material for: PM2.5 leads to adverse pregnancy outcomes by inducing trophoblast oxidative stress and mitochondrial apoptosis via KLF9/CYP1A1 transcriptional axis
Source: eLife journal article supplement (doi:10.7554/elife.85944), 2023-09-22
Supplement: fig6-data1 [file Figure6-source data1-Figure legends.docx]

**Figure6N-BCL-2** The expression of BCL-2 expression in HTR8/SVneo (CON, PM2.5, PM2.5+NAC).

**Figure6N-BAX** The expression of BAX expression in HTR8/SVneo (CON, PM2.5, PM2.5+NAC).

**Figure6N-CC3** The expression of Cleaved-Caspase 3 expression in HTR8/SVneo (CON, PM2.5, PM2.5+NAC).

**Figure6N-β-actin** The expression of β-actin expression in HTR8/SVneo (CON, PM2.5, PM2.5+NAC).
