# Supplementary material for: PM2.5 leads to adverse pregnancy outcomes by inducing trophoblast oxidative stress and mitochondrial apoptosis via KLF9/CYP1A1 transcriptional axis
Source: eLife journal article supplement (doi:10.7554/elife.85944), 2023-09-22
Supplement: fig9-data1 [file Figure9-source data1-Figure legends.docx]

**Figure9E-KLF9** The expression of KLF9 expression in the HTR8/SVneo (si-NC, si- KLF9#1, si- KLF9#2)

**Figure9E-CYP1A1** The expression of CYP1A1 expression in the HTR8/SVneo (si-NC, si- KLF9#1, si- KLF9#2)

**Figure9E-β-actin** The expression of β-actin expression in the HTR8/SVneo (si-NC, si- KLF9#1, si- KLF9#2)

**Figure9E- Vector-KLF9-KLF9** The expression of KLF9 expression in the HTR8/SVneo (CON, KLF9 over expression)

**Figure9E-Vector-KLF9-CYP1A1** The expression of CYP1A1 expression in the HTR8/SVneo (CON, KLF9 over expression)

**Figure9E-Vector-KLF9-β-actin** The expression of β-actin expression in the HTR8/SVneo (CON, KLF9 over expression)

**Figure9G-ChIP** Chromatin from KLF9 over-expression HTR8/SVneo cells was subjected to ChIP assay using KLF9 antibody or control IgG. PCR amplification with primers spanning the -96/+16 bp region of the CYP1A1 promoter was performed. A 2% agarose gel electrophoresis was performed on PCR products.
