# Supplementary material for: PM2.5 leads to adverse pregnancy outcomes by inducing trophoblast oxidative stress and mitochondrial apoptosis via KLF9/CYP1A1 transcriptional axis
Source: eLife journal article supplement (doi:10.7554/elife.85944), 2023-09-22
Supplement: fig10-figsupp1-data1 [file Figure10-figure supplement 1-source data1-Figure legends.docx]

**Figure10-figure supplement 1A-KLF9** The expression of KLF9 expression in the HTR8/SVneo cell nucleus after treated with PM2.5 (PM2.5 concentration: 0. 50μg/mL, 100μg/mL, 200μg/mL)

**Figure10-figure supplement 1B-Lamin B** The expression of Lamin B expression in the HTR8/SVneo cell nucleus after treated with PM2.5 (PM2.5 concentration: 0. 50μg/mL, 100μg/mL, 200μg/mL)
